# Supplementary material
Source: publisher site journal article supplement (https://www.spandidos-publications.com/5579/downloadSupplementary)

Figure S1. In immunocytochemistry/immunofluorescence, triplicate x200 higher magnification views were randomly selected and the number of cells that formed lamellipodia was calculated as a percentage of the total number of cells. The data are presented as the mean  $\pm$  SEM. All experiments were performed in triplicate and repeated three times (one-way ANOVA with Bonferroni's multiple comparison test, two-tailed). \* $P < 0.01$ . SCU, scutellarin.

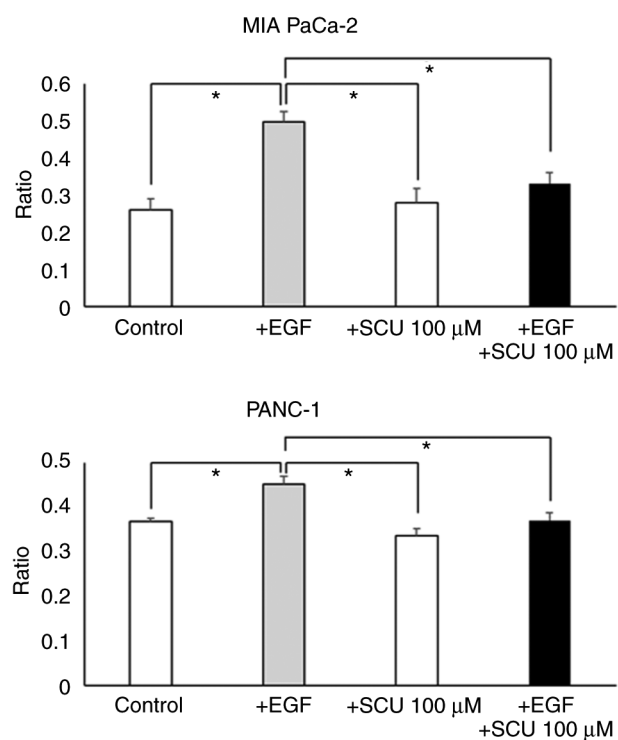

Supplement: Supplementary file 1 [file downloadSupplementary]
